# Supplementary material for: Multi-region assessment of pharmaceutical exposures and predicted effects in USA wadeable urban-gradient streams
Source: PLoS One. 2020 Jan 30;15(1):e0228214. doi: 10.1371/journal.pone.0228214 (PMC6992211; doi:10.1371/journal.pone.0228214)
Supplement: S2 Table — Gabapentin, guanylurea, and hexamethylenetetramine were analyzed only in CaSQA samples. (XLSX) [file pone.0228214.s006.xlsx]

## Sheet: TABLE S2-METHOD INFO
Pharmaceutical	NWIS parameter code	NWQL Method code	CAS number	Reporting limit (pre-2016)	RL type (pre-2016)	Reporting limit (2016-17)	RL type (2016-17)	Units	Method citation
1,7-Dimethylxanthine (p-Xanthine)	67446	DAI-HPLC/MS-MS	611-59-6	87.7	IRL	88	RLDQC	ng/L	Furlong and others, 2014
10-Hydroxy-amitriptyline	67995	DAI-HPLC/MS-MS	64520-05-4	8.3	IRL	8.3	RLDQC	ng/L	Furlong and others, 2014
Abacavir	68022	DAI-HPLC/MS-MS	136470-78-5	8.2	IRL	8.2	RLDQC	ng/L	Furlong and others, 2014
Acetaminophen	67436	DAI-HPLC/MS-MS	103-90-2	7.13	IRL	20	RLDQC	ng/L	Furlong and others, 2014
Acyclovir	67484	DAI-HPLC/MS-MS	59277-89-3	22.2	IRL	22	RLDQC	ng/L	Furlong and others, 2014
Albuterol	67437	DAI-HPLC/MS-MS	18559-94-9	6.7	IRL	6.7	RLDQC	ng/L	Furlong and others, 2014
Alprazolam	68250	DAI-HPLC/MS-MS	28981-97-7	21.3	IRL	21	RLDQC	ng/L	Furlong and others, 2014
Amitriptyline	67522	DAI-HPLC/MS-MS	50-48-6	37.2	IRL	37	RLDQC	ng/L	Furlong and others, 2014
Amphetamine	67461	DAI-HPLC/MS-MS	300-62-9	8.14	IRL	8.1	RLDQC	ng/L	Furlong and others, 2014
Antipyrine	67477	DAI-HPLC/MS-MS	60-80-0	116	IRL	116	RLDQC	ng/L	Furlong and others, 2014
Atenolol	67502	DAI-HPLC/MS-MS	29122-68-7	13.3	IRL	13	RLDQC	ng/L	Furlong and others, 2014
Atrazine	65065	DAI-HPLC/MS-MS	1912-24-9	19.4	IRL	19	RLDQC	ng/L	Furlong and others, 2014
Benztropine	67997	DAI-HPLC/MS-MS	86-13-5	24	IRL	44	RLDQC	ng/L	Furlong and others, 2014
Betamethasone	67485	DAI-HPLC/MS-MS	378-44-9	114	IRL	114	RLDQC	ng/L	Furlong and others, 2014
Bupropion	67439	DAI-HPLC/MS-MS	34911-55-2	17.8	IRL	18	RLDQC	ng/L	Furlong and others, 2014
Caffeine	67440	DAI-HPLC/MS-MS	58-08-2	90.7	IRL	91	RLDQC	ng/L	Furlong and others, 2014
Carbamazepine	67441	DAI-HPLC/MS-MS	298-46-4	11	IRL	11	RLDQC	ng/L	Furlong and others, 2014
Carisoprodol	67498	DAI-HPLC/MS-MS	78-44-4	12.5	IRL	50	RLDQC	ng/L	Furlong and others, 2014
Chlorpheniramine	67497	DAI-HPLC/MS-MS	132-22-9	4.68	IRL	54	RLDQC	ng/L	Furlong and others, 2014
Cimetidine	67442	DAI-HPLC/MS-MS	51481-61-9	27.8	IRL	42	RLDQC	ng/L	Furlong and others, 2014
Citalopram	67505	DAI-HPLC/MS-MS	59729-33-8	6.58	IRL	6.6	RLDQC	ng/L	Furlong and others, 2014
Clonidine	67518	DAI-HPLC/MS-MS	4205-90-7	60.8	IRL	61	RLDQC	ng/L	Furlong and others, 2014
Codeine	67443	DAI-HPLC/MS-MS	76-57-3	88.3	IRL	88	RLDQC	ng/L	Furlong and others, 2014
Cotinine	67444	DAI-HPLC/MS-MS	486-56-6	6.37	IRL	6.4	RLDQC	ng/L	Furlong and others, 2014
Dehydronifedipine	67445	DAI-HPLC/MS-MS	67035-22-7	24.5	IRL	30	RLDQC	ng/L	Furlong and others, 2014
Desmethyldiltiazem	67999	DAI-HPLC/MS-MS	130606-60-9	12.4	IRL	70	RLDQC	ng/L	Furlong and others, 2014
Desvenlafaxine	68251	DAI-HPLC/MS-MS	93413-62-8	7.49	IRL	84	RLDQC	ng/L	Furlong and others, 2014
Dextromethorphan	67468	DAI-HPLC/MS-MS	125-71-3	8.2	IRL	8.2	RLDQC	ng/L	Furlong and others, 2014
Diazepam (valium)	67499	DAI-HPLC/MS-MS	439-14-5	2.24	IRL	4	RLDQC	ng/L	Furlong and others, 2014
Diltiazem	67519	DAI-HPLC/MS-MS	42399-41-7	10.2	IRL	10	RLDQC	ng/L	Furlong and others, 2014
Diphenhydramine	67447	DAI-HPLC/MS-MS	147-24-0	5.79	IRL	19	RLDQC	ng/L	Furlong and others, 2014
Duloxetine	67448	DAI-HPLC/MS-MS	116539-59-4	36.6	IRL	37	RLDQC	ng/L	Furlong and others, 2014
Erythromycin	67449	DAI-HPLC/MS-MS	114-07-8	53.1	IRL	80	RLDQC	ng/L	Furlong and others, 2014
Ezetimibe	67487	DAI-HPLC/MS-MS	163222-33-1	63.5	IRL	205	RLDQC	ng/L	Furlong and others, 2014
Fadrozole	68012	DAI-HPLC/MS-MS	102676-47-1	7.32	IRL	13	RLDQC	ng/L	Furlong and others, 2014
Famotidine	68000	DAI-HPLC/MS-MS	76824-35-6	10.7	IRL	34	RLDQC	ng/L	Furlong and others, 2014
Fenofibrate	67489	DAI-HPLC/MS-MS	49562-28-9	6.28	IRL	14	RLDQC	ng/L	Furlong and others, 2014
Fexofenadine	67510	DAI-HPLC/MS-MS	83799-24-0	19.9	IRL	96	RLDQC	ng/L	Furlong and others, 2014
Fluconazole	67478	DAI-HPLC/MS-MS	86386-73-4	71	IRL	71	RLDQC	ng/L	Furlong and others, 2014
Fluoxetine	67450	DAI-HPLC/MS-MS	54910-89-3	27	IRL	26	RLDQC	ng/L	Furlong and others, 2014
Fluticasone propionate	67529	DAI-HPLC/MS-MS	80474-14-2	4.62	IRL	4.6	RLDQC	ng/L	Furlong and others, 2014
Fluvoxamine	67521	DAI-HPLC/MS-MS	54739-18-3	53.8	IRL	80	RLDQC	ng/L	Furlong and others, 2014
Gabapentin	52817	DAI-HPLC/MS-MS	60142-96-3	--	--	400	RLDQC	ng/L	Furlong and others, 2014
Glipizide	68001	DAI-HPLC/MS-MS	29094-61-9	148	IRL	80	RLDQC	ng/L	Furlong and others, 2014
Glyburide	68002	DAI-HPLC/MS-MS	10238-21-8	3.95	IRL	58	RLDQC	ng/L	Furlong and others, 2014
Guanylurea	52816	DAI-HPLC/MS-MS	141-83-3	400	IRL	400	RLDQC	ng/L	Furlong and others, 2014
Hexamethylenetetramine	52815	DAI-HPLC/MS-MS	100-97-0	40	IRL	110	RLDQC	ng/L	Furlong and others, 2014
Hydrocodone	67506	DAI-HPLC/MS-MS	125-29-1	10.5	IRL	10	RLDQC	ng/L	Furlong and others, 2014
Hydrocortisone	67459	DAI-HPLC/MS-MS	50-23-7	147	IRL	147	RLDQC	ng/L	Furlong and others, 2014
Hydroxyzine	68005	DAI-HPLC/MS-MS	68-88-2	7.43	IRL	7.4	RLDQC	ng/L	Furlong and others, 2014
Iminostilbene	67481	DAI-HPLC/MS-MS	256-96-2	145	IRL	145	RLDQC	ng/L	Furlong and others, 2014
Ketoconazole	68014	DAI-HPLC/MS-MS	65277-42-1	113	IRL	113	RLDQC	ng/L	Furlong and others, 2014
Lamivudine	68018	DAI-HPLC/MS-MS	134678-17-4	16.1	IRL	16	RLDQC	ng/L	Furlong and others, 2014
Lidocaine	67462	DAI-HPLC/MS-MS	137-58-6	15.2	IRL	38	RLDQC	ng/L	Furlong and others, 2014
Loperamide	67515	DAI-HPLC/MS-MS	53179-11-6	11.5	IRL	80	RLDQC	ng/L	Furlong and others, 2014
Loratadine	67488	DAI-HPLC/MS-MS	79794-75-5	6.95	IRL	7	RLDQC	ng/L	Furlong and others, 2014
Lorazepam	67470	DAI-HPLC/MS-MS	846-49-1	116	IRL	202	RLDQC	ng/L	Furlong and others, 2014
Meprobamate	67464	DAI-HPLC/MS-MS	57-53-4	86	IRL	86	RLDQC	ng/L	Furlong and others, 2014
Metaxalone	67504	DAI-HPLC/MS-MS	1665-48-1	15.6	IRL	16	RLDQC	ng/L	Furlong and others, 2014
Metformin	67492	DAI-HPLC/MS-MS	657-24-9	13.1	IRL	13	RLDQC	ng/L	Furlong and others, 2014
Methadone	67500	DAI-HPLC/MS-MS	76-99-3	7.61	IRL	7.6	RLDQC	ng/L	Furlong and others, 2014
Methocarbamol	67501	DAI-HPLC/MS-MS	532-03-6	8.72	IRL	11	RLDQC	ng/L	Furlong and others, 2014
Methotrexate	67525	DAI-HPLC/MS-MS	59-05-2	52.4	IRL	52	RLDQC	ng/L	Furlong and others, 2014
Methyl-1H-benzotriazole	67514	DAI-HPLC/MS-MS	29385-43-1	141	IRL	80	RLDQC	ng/L	Furlong and others, 2014
Metoprolol	67523	DAI-HPLC/MS-MS	51384-51-1	27.5	IRL	27	RLDQC	ng/L	Furlong and others, 2014
Morphine	67458	DAI-HPLC/MS-MS	57-27-2	14	IRL	80	RLDQC	ng/L	Furlong and others, 2014
Nadalol	68006	DAI-HPLC/MS-MS	42200-33-9	80.8	IRL	20	RLDQC	ng/L	Furlong and others, 2014
Nevirapine	68017	DAI-HPLC/MS-MS	129618-40-2	15.1	IRL	290	RLDQC	ng/L	Furlong and others, 2014
Nicotine	67493	DAI-HPLC/MS-MS	54-11-5	57.8	IRL	58	RLDQC	ng/L	Furlong and others, 2014
Nizatidine	67479	DAI-HPLC/MS-MS	76963-41-2	19	IRL	80	RLDQC	ng/L	Furlong and others, 2014
Nordiazepam	68252	DAI-HPLC/MS-MS	1088-11-5	41.4	IRL	20	RLDQC	ng/L	Furlong and others, 2014
Norethindrone	67434	DAI-HPLC/MS-MS	68-22-4	10.9	IRL	20	RLDQC	ng/L	Furlong and others, 2014
Norfluoxetine	67451	DAI-HPLC/MS-MS	56161-73-0	199	IRL	80	RLDQC	ng/L	Furlong and others, 2014
Norsertraline	67532	DAI-HPLC/MS-MS	87857-41-8	192	IRL	80	RLDQC	ng/L	Furlong and others, 2014
Norverapamil	68007	DAI-HPLC/MS-MS	67018-85-3	8.58	IRL	8.6	RLDQC	ng/L	Furlong and others, 2014
Omeprazole + Esomprazole	67512	DAI-HPLC/MS-MS	--	5.62	IRL	16	RLDQC	ng/L	Furlong and others, 2014
Oseltamivir	67511	DAI-HPLC/MS-MS	196618-13-0	14.6	IRL	15	RLDQC	ng/L	Furlong and others, 2014
Oxazepam	67469	DAI-HPLC/MS-MS	604-75-1	140	IRL	226	RLDQC	ng/L	Furlong and others, 2014
Oxycodone	67495	DAI-HPLC/MS-MS	76-42-6	24.9	IRL	25	RLDQC	ng/L	Furlong and others, 2014
Paroxetine	67527	DAI-HPLC/MS-MS	61869-08-7	20.6	IRL	264	RLDQC	ng/L	Furlong and others, 2014
Penciclovir	68021	DAI-HPLC/MS-MS	39809-25-1	40.2	IRL	80	RLDQC	ng/L	Furlong and others, 2014
Pentoxifylline	67480	DAI-HPLC/MS-MS	6493-05-06	9.35	IRL	9.4	RLDQC	ng/L	Furlong and others, 2014
Phenazopyridine	68008	DAI-HPLC/MS-MS	94-78-0	13.3	IRL	13	RLDQC	ng/L	Furlong and others, 2014
Phendimetrazine	67496	DAI-HPLC/MS-MS	634-03-7	31.1	IRL	31	RLDQC	ng/L	Furlong and others, 2014
Phenytoin	67466	DAI-HPLC/MS-MS	57-41-0	188	IRL	188	RLDQC	ng/L	Furlong and others, 2014
Piperonyl butoxide	67435	DAI-HPLC/MS-MS	51-03-6	3.07	IRL	20	RLDQC	ng/L	Furlong and others, 2014
Prednisolone	67483	DAI-HPLC/MS-MS	50-24-8	150	IRL	150	RLDQC	ng/L	Furlong and others, 2014
Prednisone	67467	DAI-HPLC/MS-MS	53-03-2	168	IRL	168	RLDQC	ng/L	Furlong and others, 2014
Promethazine	67524	DAI-HPLC/MS-MS	60-87-7	50	IRL	80	RLDQC	ng/L	Furlong and others, 2014
Propoxyphene	68009	DAI-HPLC/MS-MS	469-62-5	17.2	IRL	17	RLDQC	ng/L	Furlong and others, 2014
Propranolol	67516	DAI-HPLC/MS-MS	525-66-6	26.3	IRL	26	RLDQC	ng/L	Furlong and others, 2014
Pseudoephedrine + Ephedrine	67460	DAI-HPLC/MS-MS	--	11.1	IRL	11	RLDQC	ng/L	Furlong and others, 2014
Quinine	68011	DAI-HPLC/MS-MS	130-95-0	79.9	IRL	80	RLDQC	ng/L	Furlong and others, 2014
Ractopamine	52814	DAI-HPLC/MS-MS	97825-25-7	40	IRL	20	RLDQC	ng/L	Furlong and others, 2014
Raloxifene	67530	DAI-HPLC/MS-MS	84449-90-1	9.72	IRL	80	RLDQC	ng/L	Furlong and others, 2014
Ranitidine	67452	DAI-HPLC/MS-MS	66357-35-5	192	IRL	192	RLDQC	ng/L	Furlong and others, 2014
Sertraline	67528	DAI-HPLC/MS-MS	79617-96-2	16.2	IRL	16	RLDQC	ng/L	Furlong and others, 2014
Sitagliptin	67531	DAI-HPLC/MS-MS	486460-32-6	97.3	IRL	97	RLDQC	ng/L	Furlong and others, 2014
Sulfadimethoxine	67503	DAI-HPLC/MS-MS	122-11-2	65.5	IRL	65	RLDQC	ng/L	Furlong and others, 2014
Sulfamethizole	67476	DAI-HPLC/MS-MS	144-82-1	104	IRL	104	RLDQC	ng/L	Furlong and others, 2014
Sulfamethoxazole	67454	DAI-HPLC/MS-MS	723-46-6	26.1	IRL	26	RLDQC	ng/L	Furlong and others, 2014
Tamoxifen	68015	DAI-HPLC/MS-MS	10540-29-1	80	IRL	270	MRL	ng/L	Furlong and others, 2014
Temazepam	67471	DAI-HPLC/MS-MS	846-50-4	18.4	IRL	18	RLDQC	ng/L	Furlong and others, 2014
Theophylline	67494	DAI-HPLC/MS-MS	58-55-9	41.5	IRL	80	RLDQC	ng/L	Furlong and others, 2014
Thiabendazole	67455	DAI-HPLC/MS-MS	148-79-8	4.1	IRL	11	RLDQC	ng/L	Furlong and others, 2014
Tiotropium	67508	DAI-HPLC/MS-MS	186691-13-4	43.1	IRL	200	RLDQC	ng/L	Furlong and others, 2014
Tramadol	67517	DAI-HPLC/MS-MS	27203-92-5	15.1	IRL	15	RLDQC	ng/L	Furlong and others, 2014
Triamterene	67475	DAI-HPLC/MS-MS	396-01-0	5.25	IRL	5.2	RLDQC	ng/L	Furlong and others, 2014
Trimethoprim	67456	DAI-HPLC/MS-MS	738-70-5	19	IRL	20	RLDQC	ng/L	Furlong and others, 2014
Valacyclovir	67507	DAI-HPLC/MS-MS	124832-26-4	163	IRL	163	RLDQC	ng/L	Furlong and others, 2014
Venlafaxine	67534	DAI-HPLC/MS-MS	93413-69-5	4.48	IRL	5.2	RLDQC	ng/L	Furlong and others, 2014
Verapamil	67472	DAI-HPLC/MS-MS	52-53-9	15.5	IRL	140	RLDQC	ng/L	Furlong and others, 2014
Warfarin	67457	DAI-HPLC/MS-MS	81-81-2	6.03	IRL	6	RLDQC	ng/L	Furlong and others, 2014
Specific conductance	90095	Laboratory measured	--	5	MRL	5	MRL	uS/cm	Fishman and Friedman, 1989
Calcium	915	ICP-AES	7440-70-2	0.022	DLDQC	0.022	DLDQC	mg/L	Fishman and Friedman, 1989
Magnesium	925	ICP-AES	7439-95-4	0.011	DLDQC	0.011	DLDQC	mg/L	Fishman, 1993
Sodium	930	ICP-AES	7440-23-5	0.4	DLDQC	0.4	DLDQC	mg/L	Fishman, 1993
Chloride	940	IC	16887-00-6	0.02	DLDQC	0.02	DLDQC	mg/L	Fishman and Friedman, 1989
Sulfate	945	IC	14808-79-8	0.02	DLDQC	0.02	DLDQC	mg/L	Fishman and Friedman, 1989
Potassium	935	ICP-AES	7440-09-7	0.3	DLDQC	0.3	DLDQC	mg/L	Standard Methods, 3120
#Table 2. Pharmaceutical compound information for analyses performed by the USGS National Water Quality Laboratory (NWQL) as part of the USGS Regional Stream Quality Assessment (RSQA) synoptic samplings in the Pacific Northwest (PNSQA, 2015), Northeast (NESQA, 2016), California (CaSQA, 2017), and Southeast (SESQA, 2014) regions.
#[Gabapentin, Guanylurea, and Hexamethylenetetramine were analyzed only in CSQA samples. Reporting limits established by NWQL may have been adjusted due to quality assurance issues, see specific tables for adjustments.]
#[CAS number, chemical abstract services registry number; --, not available; RL, reporting limit; IRL, interim reporting limit; MRL, minimum reporting limit; RLDQC, reporting limit by DQCALC; IC, Ion chromatography; ICP-AES, Inductively coupled plasma-atomic emission spectrometry; DAI-HPLC/MS-MS, direct aqueous injection-high performance liquid chromatography/tandem mass spectrometry]
#[Furlong E, Noriega M, Kanagy C, Kanagy L, Coffey L, Burkhardt M. Methods of the National Water Quality Laboratory. Chapter B10. Determination of human-use pharmaceuticals in filtered water by direct aqueous injection–high-performance liquid chromatography/tandem mass spectrometry, 2014, pp. 49.]
#[Fishman, M.J., ed., 1993, Methods of analysis by the U.S. Geological Survey National Water Quality Laboratory--Determination of inorganic and organic constituents in water and fluvial sediments: U.S. Geological Survey Open-File Report 93-125, 217 p.]
#[Fishman, M.J., and Friedman, L.C., 1989, Methods for determination of inorganic substances in water and fluvial sediments: U.S. Geological Survey Techniques of Water-Resources Investigations, book 5, chap. A1, 545 p.]
#[Standard methods for the examination of water and wastewater (20th edition), 1998; Washington, D.C., American Public Health Association, American Water Works Association, and Water Environment Federation, 3120, p3-37 to 3-43.]
