# Supplementary material for: Multi-region assessment of pharmaceutical exposures and predicted effects in USA wadeable urban-gradient streams
Source: PLoS One. 2020 Jan 30;15(1):e0228214. doi: 10.1371/journal.pone.0228214 (PMC6992211; doi:10.1371/journal.pone.0228214)
Supplement: S10 Table — (XLSX) [file pone.0228214.s014.xlsx]

## Sheet: TABLE S10-TOXEVAL EXCLUSIONS
CAS number	endPoint
84852-15-3	NVS_ENZ_hPTEN
84-66-2	NVS_ENZ_rMAOBP
486-56-6	TOX21_p53_BLA_p3_viability
51218-45-2	TOX21_p53_BLA_p5_ratio
86−74−8	TOX21_p53_BLA_p3_ratio
115−86−6	TOX21_p53_BLA_p3_ratio
115−96−8	TOX21_p53_BLA_p3_ratio
206−44−0	TOX21_p53_BLA_p3_ratio
115-86-6	NVS_NR_hPPARg
80-05-7	CLD_CYP1A1_6hr
80-05-7	CLD_CYP1A2_6hr
82657-04-3	BSK_3C_Vis_down
82657-04-3	TOX21_NFkB_BLA_agonist_ch1
82657-04-3	NVS_NR_hPR
120068-37-3	NVS_NR_hCAR_Antagonist
60-51-5	NVS_NR_bER
13194-48-4	NCCT_QuantiLum_inhib_dn
161050-58-4	ATG_Myb_CIS_up
173584-44-6	ATG_HSE_CIS_up
30560-19-1	BSK_3C_SRB_up
30560-19-1	ATG_M_19_TRANS_dn
61949-77-7	ATG_CMV_CIS_dn
94-74-6	NVS_NR_hCAR_Antagonist
94-74-6	NVS_NR_hPPARg
51218-45-2	TOX21_p53_BLA_p5_ch2
759-94-4	ATG_Xbp1_CIS_dn
759-94-4	ATG_MRE_CIS_dn
759-94-4	ATG_HNF6_CIS_dn
759-94-4	ATG_GATA_CIS_dn
759-94-4	ATG_Myb_CIS_dn
759-94-4	ATG_PBREM_CIS_dn
759-94-4	TOX21_p53_BLA_p3_viability
834-12-8	TOX21_p53_BLA_p4_ratio
122836-35-5	ATG_TA_CIS_dn
87674-68-8	TOX21_p53_BLA_p2_ch2
87674-68-8	TOX21_p53_BLA_p2_ratio
111991-09-4	TOX21_AutoFluor_HEK293_Media_blue
51235-04-2	TOX21_p53_BLA_p5_ratio
51235-04-2	TOX21_p53_BLA_p5_ch1
51235-04-2	TOX21_p53_BLA_p5_viability
298−46−4	Tanguay_ZF_120hpf_ActivityScore
1763−23−1	Tanguay_ZF_120hpf_ActivityScore
#Table S10. Compound:Endpoint combinations excluded from ToxCast evaluation due to unreliable concentration-response relationship and resulting lack of confidence in activity concentration at cutoff (ACC).
#[CAS number, Chemical Abstract Services Registry Number; endpoint, ToxCast assay endpoint name (https://www.epa.gov/chemical-research/toxicity-forecasting)]
